# Supplementary material for: Total Usual Nutrient Intakes and Nutritional Status of United Arab Emirates Children (4 Years–12.9 Years): Findings from the Kids Nutrition and Health Survey (KNHS) 2021
Source: MDPI journal article supplement (doi:10.3390/nu15010234), 2023-01-02
Supplement: s1 [file s1]

## Supplementary Material

**Table S1** An overview of the food groups and the food items within each food group.

|                                 |                                                                                                                                                                                                                                                                                                                              |
|---------------------------------|------------------------------------------------------------------------------------------------------------------------------------------------------------------------------------------------------------------------------------------------------------------------------------------------------------------------------|
| Grains and Grains Products      | Whole grains, Wheat, bread, rolls, pita, saj, cereals, crackers, pretzels, kaak, pasta, rice, & other grains                                                                                                                                                                                                                 |
| Fruits                          | Apples, bananas, berries, citrus fruits, grapes, kiwi, melons, fresh mixed fruits, peaches, pears, pineapples, plums, pomegranate, dried fruits, 100% juices, & other fruits                                                                                                                                                 |
| Vegetables                      | Broccoli, greens, spinach, beets, carrots, sweet potatoes, white potatoes, cabbage, cauliflower, celery, cucumber, eggplant, green beans, lettuce, mushrooms, okra, onions, peppers, radishes, zucchini, corn, green peas, pumpkin, tomatoes/tomato sauces, & other vegetables                                               |
| Milk and Milk Products          | Cow's milk, cheeses, labneh 'strained yogurt', & yogurt                                                                                                                                                                                                                                                                      |
| Meats and Other Protein Sources | Dried beans, peas, legumes, eggs, egg dishes, beef, chicken, deli meat, fish, lamb, goat, organ meats, peanut butter, raw and roasted nuts, & seeds.                                                                                                                                                                         |
| Mixed Dishes                    | Beans and rice, other bean mixtures, beef with vegetables and/or rice/pasta, chicken or turkey with vegetables and/or rice/pasta, fish or shellfish with vegetables and/or rice/pasta, stuffed vegetables, other grain mixed dishes, pasta-mixed dishes, pizzas, rice based dishes, sandwiches, soups, & yogurt-based dishes |
| Savory Snacks                   | Corn chips, nachos, popcorn, potato chips, & puffs                                                                                                                                                                                                                                                                           |
| Sweets and Sweetened Beverages  | Candies, gelatins, Sorbets, Ice cream, frozen yogurt, pudding, milk flavorings sugar, syrups, preserves, jelly, sweet baked goods, energy drinks, fruit-flavored drinks, soft drinks, & sweetened tea & coffee                                                                                                               |
| Fats and Oils                   | Butter, margarine, animal fats dressings, oils, & olives                                                                                                                                                                                                                                                                     |
| Condiments and Sauces           | Condiments, herbs, seasonings, gravies, & sauces                                                                                                                                                                                                                                                                             |
